# Supplementary material for: A quasi-randomised, controlled, feasibility trial of GLITtER (Green Light Imaging Interpretation to Enhance Recovery)—a psychoeducational intervention for adults with low back pain attending secondary care
Source: PeerJ. 2018 Feb 1;6:e4301. doi: 10.7717/peerj.4301 (PMC5797685; doi:10.7717/peerj.4301)

# GLITtER: Green Light Imaging Interpretation to Enhance Recovery

A framework for content delivery for SAC Clinicians

---

Emma Karran

## OVERVIEW OF THE 'GLITTER' CONSULTATION:

- Routine SAC Assessment
- Completion of Eligibility Checklist (by SAC clinician)
- Routine management + GLITTER Consultation (Integrated)

### Glitter Consultation Includes:

- PART 1: Review of Imaging (incorporate 'GREEN LIGHT' interpretation)
- PART 2: Management Recommendations (incorporate activity TICK list)
- PART 3: Introduction to take-home information (weeks 1-4)
- PART 4: Completion of GLITTER Checklist (by patient)
- PART 5: Provision of information regarding follow-up (on the back of the GLITTER checklist)

### Communication with GP:

- PART 6: GLITTER addition to standard reporting template

## Eligibility Checklist (SAC Clinician to complete following patient assessment)

UR Number: \_\_\_\_\_

### Does this patient.....

|                                                                        |     |    |
|------------------------------------------------------------------------|-----|----|
| 1. Require further imaging, investigations or intervention?            | Yes | No |
| 2. Require further surgical opinion?                                   | Yes | No |
| 3. Have lumbar pathology warranting significant caution with activity? | Yes | No |
| 4. Engage in their usual activity, unrestricted by pain?               | Yes | No |
| 5. Engage in regular exercise, unrestricted by pain?                   | Yes | No |

(Circle)

- Eligibility confirmed if "NO" for ALL questions

## PART 1: Review of imaging (incorporate 'GREEN LIGHT' interpretation)

E.g. Let's have a look at your scans (put scans in view.....)

Before we have a close look I want to explain to you a bit about normal findings on scans.

- Aim: **Re-frame normal findings** (prior to interpreting the patient's scans)
  - Refer to graph: findings in *asymptomatic* adults

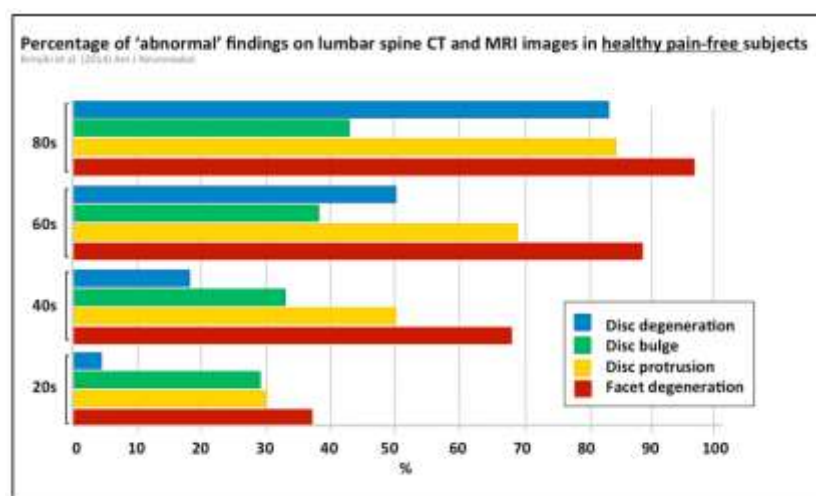

- We now understand that many scan findings like degeneration and disc bulges are actually completely normal – you can think of them a bit like wrinkly skin or grey hair: as physical changes that 'just happen' over time.

‘Walk through’ patient scan results. (Discuss this further with YH).

- Include orientation, explanation and interpretation of findings.

Highlight the following points, using visual aids as appropriate:

- Most/many of the findings on your scan are also found on scans of people who have never had back pain.
  - They would have been present well BEFORE your back pain started.
  - And they will still be there once your back pain has settled.
  - **Visual aid:** Refer to 2 images from PAINFREE individuals (not sure – to discuss)
- There is also often very little link between scan findings and a person’s activity levels
  - **Visual aid (optional):** Show tennis player or older jogger (depending on age) and their matched scans.
- Summary: Scans (on their own) actually don’t explain much about
  - Your current pain – especially why you have good days and bad
  - The activity you are capable of
  - Or how likely you are to recover: because the changes on your scans will still be there when your pain goes away.

Refer back to scans:

- “I want to show you a few things that I see when I look at your scans.....”  
(Reinforce that spine is structurally sound and needs to move – via evidence on scans)

For example -

- ❖ Evenly sized vertebrae that are well aligned
- ❖ A spine that has adapted to load over time....
  - Thickening around joints and ligaments, narrowing and bulging of discs....these are not abnormal – they are like the wrinkles in your skin that deepen as you age
- ❖ A structure that is really strong, and withstands all sorts of stresses and strains. It has a crucial role of protecting the spinal cord and nerves throughout your life which is why its strength is so important.
  - Supported at the front and back by strong ligaments
  - Vertebrae connected by discs and facet joints designed to give stability
  - Big areas of muscle bulk on the front and back
- ❖ A spine that (as well as being stable and strong) **needs movement to be healthy**

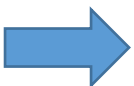

It is safe for you to be active and to increase your activity levels, and it is important for your recovery that you do so.

**(“you have been given the green light”:** if it works to toss in this phrase or reference to “green light” then do so)

## PART 2: Management recommendations (incorporate activity TICK list)

Offer usual management recommendations.

In addition, introduce to the TICK list (suggest it as a strategy that they might like to use to help with scheduling some extra activity or exercise into their week).

## PART 3: Introduce to further information (weeks 1-4), provide magnets for fridge!

- Explain that they will be given the poster to take home which has 4 weeks-worth of information. They will put up 1 week at a time, and will be sent a text message each week to remind them to change it. They will also be sent a link to some further online information about pain, recovery and exercise.
- The information includes:
  - A re-cap of things we have spoken about today regarding your scans.
  - Some interesting things about PAIN and how complex it is. Pain doesn't always mean that you are doing damage to yourself.
  - The importance of activity and exercise for your recovery
  - And gives you a weekly TICK list to fill in at the start of each week – which might help you to get started with moving more.

## PART 4: GLITTER Checklist (patient to complete at end of the session)

After my appointment today I understand that.....

|                                                |     |          |     |
|------------------------------------------------|-----|----------|-----|
| 1. I need an operation on my back              | Yes | Possibly | No  |
| 2. I need further scans of my back             | Yes | Possibly | No  |
| 3. My scans show things I should worry about   | Yes | Possibly | No  |
| 4. It is safe to be active and exercise        | No  | Unsure   | Yes |
| 5. Activity and exercise will help my recovery | No  | Unsure   | Yes |

(circle the answer you agree with)

**PART 5:** Provide with information regarding follow-up (on the back of the GLITTER checklist):

WHAT TO EXPECT following your appointment today:

- ❖ You will receive a brief, follow up text message next Monday. You do not need to reply to this message.
- ❖ You will receive 3 further brief text messages on the following 3 Mondays. (No reply required).
- ❖ 1 month after this appointment: you will receive some forms in the mail to fill in and return (in a postage-paid envelope).
- ❖ 3 months after this appointment: you will receive some further forms to fill in and return.
- ❖ You will not be contacted further after we have received your completed follow-up forms.
- ❖ Results of this study will be able to be found at: [www.bodyinmind.org](http://www.bodyinmind.org)

THANK YOU very much!

## **PART 6:** Communication with GP - GLITTER reporting template

*Your patient has been included in a pilot study being conducted in the Spinal Assessment Clinic. This study is designed to assess the feasibility of integrating a novel educational intervention into the standard clinic consultation.*

*The intervention involves:*

- *Explanation of 'normal' imaging findings and interpretation of the patient's images*
- *Provision of take-home information*
- *Weekly follow-up SMS messages (for 4 weeks) with links to online resources*
- *Provision of a practical tool to facilitate increased activity/exercise*

*The intervention aims to deliver a 'positive' interpretation of imaging findings to reassure patients that movement is safe and is necessary for recovery. Key messages are:*

- *Surgical intervention is not indicated and further scans are not required*
- *Scan findings should not cause worry; it is safe to be active*
- *Pain is complex (chronic pain often has little to do with damage)*
- *Activity and exercise are important for recovery and have many benefits*

*Further information can be obtained by contacting the Principal Investigator:*

[Emma.Karran@mymai.unisa.edu.au](mailto:Emma.Karran@mymai.unisa.edu.au)

**Figure 1. Study Flow: Prospective, comparative, feasibility trial of GLITTER**

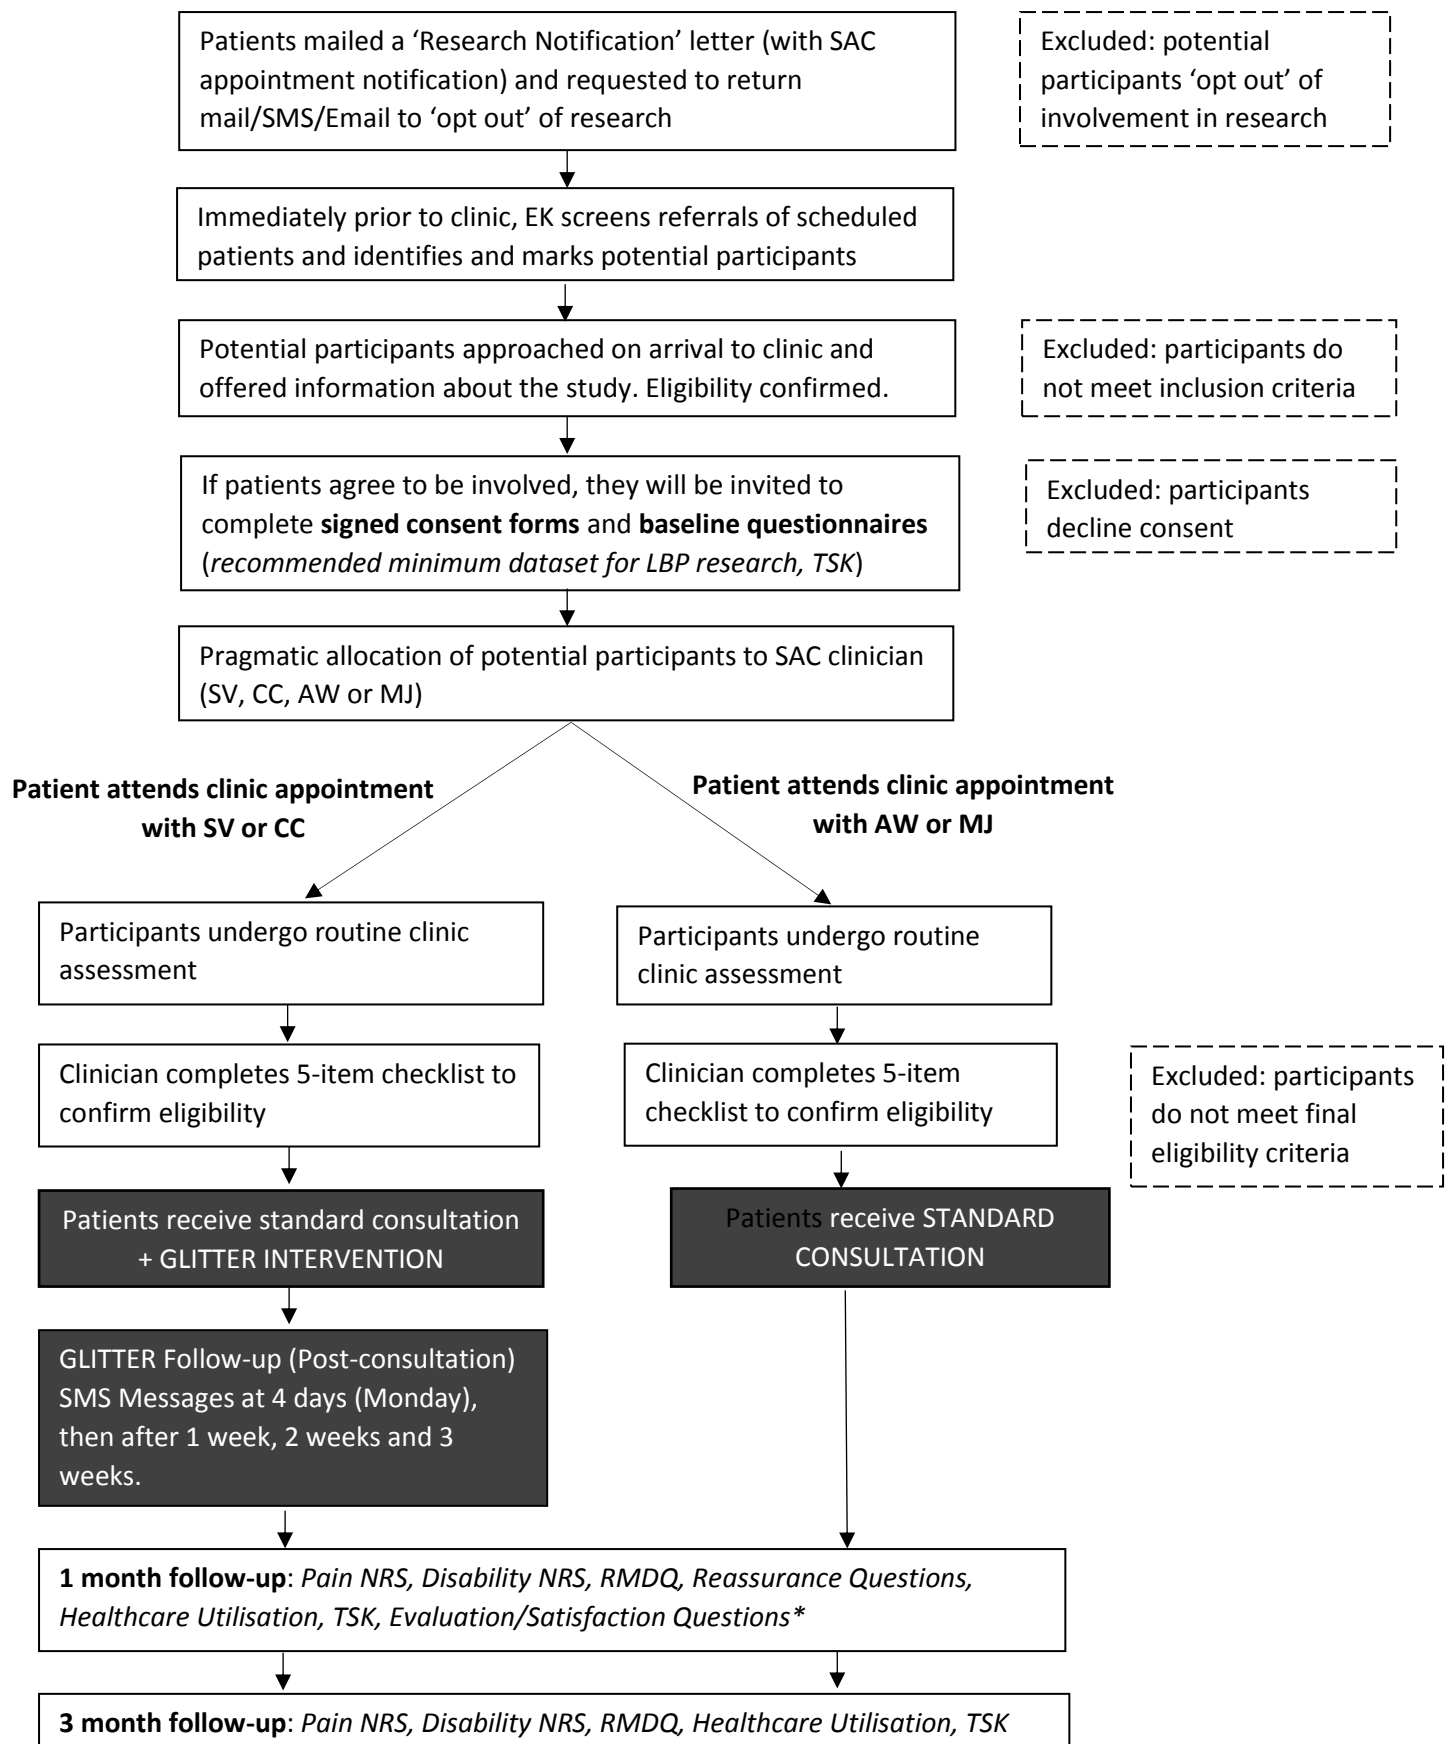

Supplement: Supplemental Information 3 [file peerj-06-4301-s003.pdf]
