# Supplementary material for: A quasi-randomised, controlled, feasibility trial of GLITtER (Green Light Imaging Interpretation to Enhance Recovery)—a psychoeducational intervention for adults with low back pain attending secondary care
Source: PubMed Central journal article supplement (PMC5797685; doi:10.7717/peerj.4301), 2018-02-01
Supplement: peerj-06-4301-s001.pdf [file peerj-06-4301-s001.pdf]

## Supplement 1– Trial registration data

---

| Data Category                                 | Information                                                                                                                                                                                                                                                                                            |
|-----------------------------------------------|--------------------------------------------------------------------------------------------------------------------------------------------------------------------------------------------------------------------------------------------------------------------------------------------------------|
| Primary registry and trial identifying number | ANZCTR:                                                                                                                                                                                                                                                                                                |
| Date of registration in primary registry      | February, 2017                                                                                                                                                                                                                                                                                         |
| Secondary identifying numbers                 | Not applicable                                                                                                                                                                                                                                                                                         |
| Source(s) of monetary or material support     | Royal Adelaide Hospital Research Foundation; NHMRC                                                                                                                                                                                                                                                     |
| Primary sponsor                               | Royal Adelaide Hospital Research Foundation                                                                                                                                                                                                                                                            |
| Secondary sponsor(s)                          | University of South Australia                                                                                                                                                                                                                                                                          |
| Contact for public queries                    | EK, <a href="mailto:Emma.Karran@mymail.unisa.edu.au">Emma.Karran@mymail.unisa.edu.au</a>                                                                                                                                                                                                               |
| Contact for scientific queries                | EK, <a href="mailto:Emma.Karran@mymail.unisa.edu.au">Emma.Karran@mymail.unisa.edu.au</a> ; LM, <a href="mailto:Lorimer.Moseley@unisa.edu.au">Lorimer.Moseley@unisa.edu.au</a>                                                                                                                          |
| Public title                                  | GLITtER (Green Light Imaging Interpretation to Enhance Recovery): a psychoeducational intervention for adults with low back pain attending secondary care                                                                                                                                              |
| Scientific title                              | A quasi-randomised, controlled, feasibility trial of GLITtER (Green Light Imaging Interpretation to Enhance Recovery) – a psychoeducational intervention for adults with low back pain attending secondary care                                                                                        |
| Countries of recruitment                      | Australia                                                                                                                                                                                                                                                                                              |
| Health condition(s) or problem(s) studied     | Low back pain; Chronic low back pain                                                                                                                                                                                                                                                                   |
| Intervention(s)                               | Intervention group: Integration of the GLITtER intervention into ‘standard practice’ consultation<br>Control group: ‘Standard practice’ consultation                                                                                                                                                   |
| Key inclusion and exclusion criteria          | Ages eligible for study: ≥18 years; Sexes eligible for study: all; Accepts healthy volunteers: no<br>Inclusion criteria: adult patient (18-65 years), attending Spinal Assessment Clinic, low back pain (+/- leg symptoms), access to a lumbar CT or MRI scan (performed during the previous 6 months) |

---

|                         |                                                                                                                                                                                                                                                                                                                               |
|-------------------------|-------------------------------------------------------------------------------------------------------------------------------------------------------------------------------------------------------------------------------------------------------------------------------------------------------------------------------|
|                         | Exclusion criteria: unable to speak and understand English, history of lumbar spine surgery                                                                                                                                                                                                                                   |
| Study type              | Quasi-randomised, controlled, feasibility trial                                                                                                                                                                                                                                                                               |
| Data of first enrolment | March 2 2017                                                                                                                                                                                                                                                                                                                  |
| Target sample size      | 40 (20 intervention, 20 control)                                                                                                                                                                                                                                                                                              |
| Recruitment status      | Will commence March 2017                                                                                                                                                                                                                                                                                                      |
| Primary outcomes(s)     | Determine the feasibility of recruitment and retention, assessment procedures, implementation and acceptability of the "GLITtER" intervention                                                                                                                                                                                 |
| Key secondary outcomes  | Identify any modifications needed in the design of a larger effectiveness trial.<br>Provide data (i.e. the standard deviation of the primary outcome measure: numeric rating scale score for pain at 3 month follow-up) to permit calculation of an appropriately powered sample for a subsequent randomised controlled trial |

---
