# Supplementary material for: A quasi-randomised, controlled, feasibility trial of GLITtER (Green Light Imaging Interpretation to Enhance Recovery)—a psychoeducational intervention for adults with low back pain attending secondary care
Source: PubMed Central journal article supplement (PMC5797685; doi:10.7717/peerj.4301), 2018-02-01
Supplement: peerj-06-4301-s005.pdf [file peerj-06-4301-s005.pdf]

**Supplement 5 – Outcome measures (2): Participant Experience Questionnaire & Healthcare Utilisation Questions**

---

**Please rate your responses to the following statements by ticking the appropriate box:**

|                                                                                    | Strongly disagree | Disagree | Agree | Strongly agree |
|------------------------------------------------------------------------------------|-------------------|----------|-------|----------------|
| 1. The clinician who saw me in the Spinal Clinic knew what they were talking about |                   |          |       |                |
| 2. The clinician used simple, clear language that I could easily understand        |                   |          |       |                |
| 3. The information on the handout was relevant to me                               |                   |          |       |                |
| 4. The information on the handout was helpful                                      |                   |          |       |                |
| 5. It was good to get the follow-up text messages                                  |                   |          |       |                |
| 6. Overall, I was satisfied with the care I received from the Spinal Clinic        |                   |          |       |                |
| 7. The information I have received from the Spinal Clinic will assist my recovery  |                   |          |       |                |

**Healthcare use since your Spinal Clinic appointment:**

1. In the past month, **have you seen a general practitioner** for your back pain?

Y / N                      If so, how many times? \_\_\_\_

2. In the past month, **have you seen a physiotherapist** for your back pain?

Y / N                      If so, how many times? \_\_\_\_

3. In the past month, **have you seen a chiropractor, massage therapist or other health care professional** for your back pain?

Y / N                      If so, how many times? \_\_\_\_
