# Supplementary material for: A quasi-randomised, controlled, feasibility trial of GLITtER (Green Light Imaging Interpretation to Enhance Recovery)—a psychoeducational intervention for adults with low back pain attending secondary care
Source: PubMed Central journal article supplement (PMC5797685; doi:10.7717/peerj.4301), 2018-02-01
Supplement: peerj-06-4301-s008.pdf [file peerj-06-4301-s008.pdf]

WEEK  
1
IMPORTANT THINGS TO REMEMBER  
AFTER YOUR APPOINTMENT

**DO NOT**  
Tell us much about:

- The amount of pain you feel now
- Your likely pain in the future

**DO SHOW Age-related changes:**

- Many reported changes sound abnormal, but occur naturally with age
- For example: disc bulges and degeneration
- These are like “wrinkles on the inside”

**DO SHOW Findings that:**

- Would have been there before your pain began
- Will still be there when your pain has gone

After reviewing **you and your scans** in the Spinal Clinic

You have been given the **green light**

It is safe and necessary to **MOVE** and **EXERCISE**

**THIS WEEK:** To learn more about recovering well from back pain

Plan 15 minutes to watch ..... **The truth about back pain** (we will SMS you a link)

or find it at: <https://www.youtube.com/watch?v=b-cBtPSf0Hc>

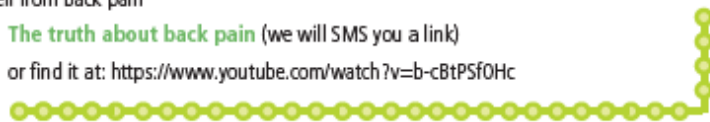

Doing regular exercise or becoming more physically active is important for your recovery.

- HOW TO GET STARTED:** Consider: .....
- What do you like to do?
  - What have you enjoyed doing in the past?
  - What would you like to do more of?
  - What could you do regularly with a friend or family member?

**WRITE IT ON YOUR ACTIVITY TICK LIST**

**PLAN TIME TO EXERCISE THIS WEEK**

|                                                                                                                             | WHAT                                                                                                                                                                                                                                                         | WHEN                                                                                                                                                                                                                                               | TICK                                                                                                                                                                                                                                                                  |
|-----------------------------------------------------------------------------------------------------------------------------|--------------------------------------------------------------------------------------------------------------------------------------------------------------------------------------------------------------------------------------------------------------|----------------------------------------------------------------------------------------------------------------------------------------------------------------------------------------------------------------------------------------------------|-----------------------------------------------------------------------------------------------------------------------------------------------------------------------------------------------------------------------------------------------------------------------|
| <p>MAKE A <b>T</b>IME</p> <p>IT'S <b>I</b>MPORTANT</p> <p>BE <b>C</b>ONSISTENT</p> <p><b>K</b>NOW YOUR BACK IS UP TO IT</p> | <p>30 min walk with Sue</p> <div style="border: 1px solid #ccc; height: 20px; margin-top: 5px;"></div> <div style="border: 1px solid #ccc; height: 20px; margin-top: 5px;"></div> <div style="border: 1px solid #ccc; height: 20px; margin-top: 5px;"></div> | <p>Monday 7pm</p> <div style="border: 1px solid #ccc; height: 20px; margin-top: 5px;"></div> <div style="border: 1px solid #ccc; height: 20px; margin-top: 5px;"></div> <div style="border: 1px solid #ccc; height: 20px; margin-top: 5px;"></div> | <p style="text-align: center;">✓</p> <div style="border: 1px solid #ccc; height: 20px; margin-top: 5px;"></div> <div style="border: 1px solid #ccc; height: 20px; margin-top: 5px;"></div> <div style="border: 1px solid #ccc; height: 20px; margin-top: 5px;"></div> |

# WEEK 2

# DO YOU KNOW HOW COMPLEX PAIN IS?

## RECOVERY ROADS: which road are you on?

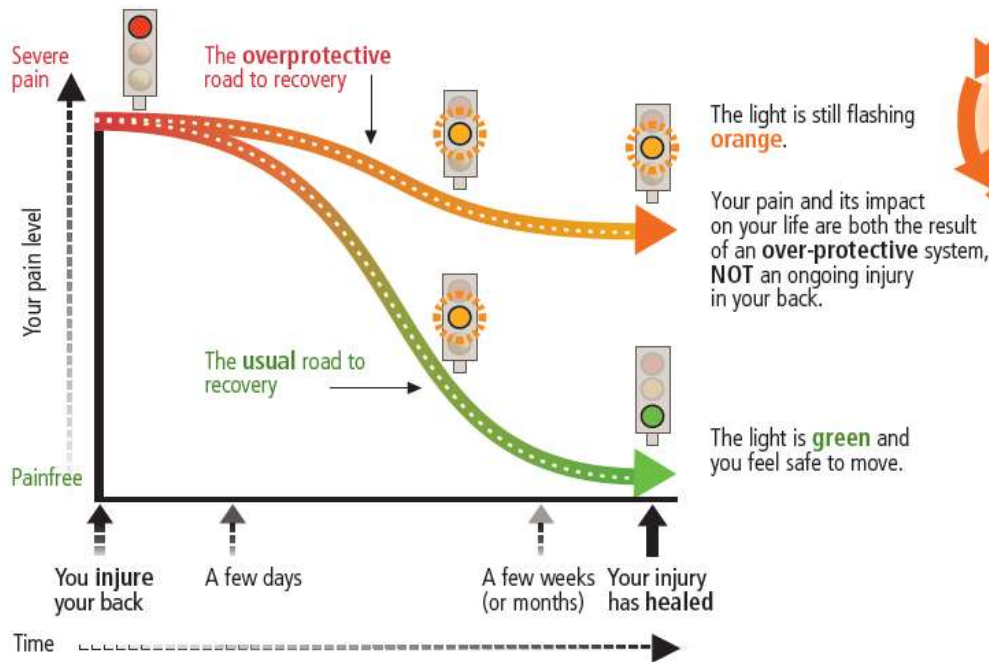

### MANY THINGS

can make your system **over-protective**

- Painful experiences with movement
- Stress
- Being worried about your back
- Lack of movement
- Low mood
- Poor general health

### HELP THE LIGHT TURN GREEN

by looking after yourself well

- 
- Sleeping well
  - Eating well
  - Reducing stress
  - Increasing activity
  - Relaxing
  - Socialising

PLAN TIME TO EXERCISE THIS WEEK

THIS WEEK: Learning more about PAIN can help your recovery.

PLAN 5 MINUTES to watch ... **Tame the Beast**

FIND IT AT: <https://www.youtube.com/watch?v=XwBYkw-iZdQ>

MAKE A **T**IME

IT'S **I**MPORTANT

BE **C**ONSISTENT

**K**NOW YOUR BACK IS UP TO IT

WHAT

WHEN

TICK

|  |  |  |
|--|--|--|
|  |  |  |
|  |  |  |
|  |  |  |

# WEEK 3

## EXERCISE IS BENEFICIAL FOR...

➤ **The health of your back:**  
Increases strength, endurance and flexibility. Your back needs to move!

➤ **Your psychological wellbeing:**  
Improves mood, reduces stress and promotes better sleep. It can be enjoyable and social.

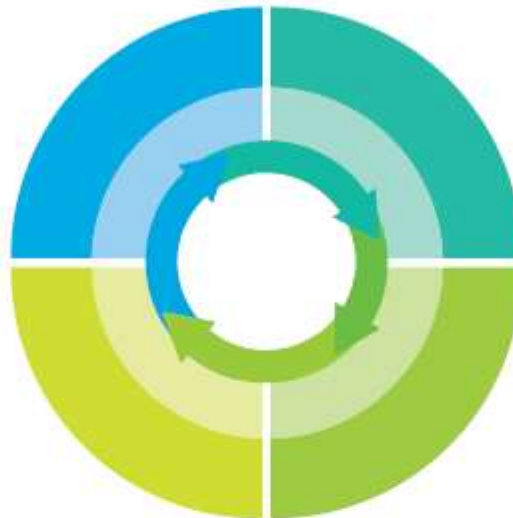

➤ **Your general health:**  
Regular exercise can help you to do things you want and need to do, and helps with weight control.

➤ **Reducing risks for other health problems:**  
Helps to prevent and manage conditions such as heart disease, diabetes and cancer.

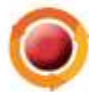

### REMEMBER: PAIN IS COMPLEX

When pain is produced by an overprotective system, it has little to do with damage

Knowing this means:

- You can worry less when you feel pain
- You can continue moving, even when you are in pain
- You can gradually do more of the active things that you enjoy

EXERCISE can also help to correct your over-protective signalling:

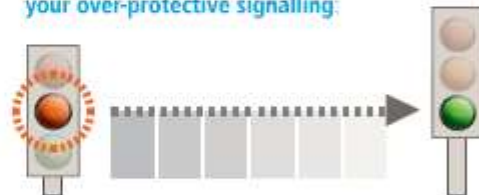

**THIS WEEK:** If being active isn't an enjoyable part of your everyday life -

Spend 10 minutes looking at: 'How to Start Exercising and Stick to It' THEN..... make a plan!

FIND IT AT: <https://www.helpguide.org/articles/healthy-living/how-to-start-exercising-and-stick-to-it.htm>

WRITE IT ON YOUR **ACTIVITY TICK LIST**

PLAN **TIME** TO EXERCISE THIS WEEK

MAKE A **T**IME

IT'S **I**MPORTANT

BE **C**ONSISTENT

**K**NOW YOUR BACK IS UP TO IT

WHAT

WHEN

TICK

| WHAT                 | WHEN                 | TICK                 |
|----------------------|----------------------|----------------------|
| <input type="text"/> | <input type="text"/> | <input type="text"/> |
| <input type="text"/> | <input type="text"/> | <input type="text"/> |
| <input type="text"/> | <input type="text"/> | <input type="text"/> |

Cite this as: Karan et al. 2017

WEEK

4

# 5 IMPORTANT THINGS TO REMEMBER

## WHAT DO YOU LIKE TO DO ?

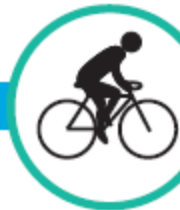

1 Your back needs movement to be healthy

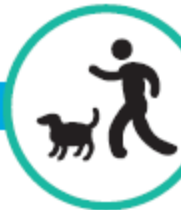

2 You were given the green light: movement and activity is safe

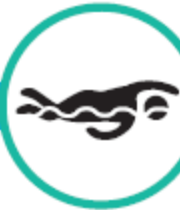

3 Many things influence pain – knowing this can help you worry less about your back

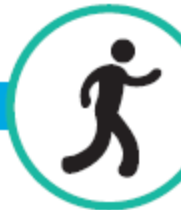

4 Long-lasting back pain often has little to do with damage

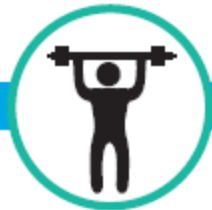

5 Regular exercise is important for your recovery and has many benefits

If you want to understand more about pain and what you can do about it plan 5 minutes to watch..... [Understanding pain in less than 5 minutes](#)

FIND IT AT: <https://www.youtube.com/embed/qEWc2XtaNwg>

## OVER THE WEEKS AHEAD:

- Continue to make PLANS for exercise – it is **IMPORTANT**.
- Be **HOPEFUL** that you will return to most of the things you like to do.
- **EXPECT** to have 'ups and downs': life has ups and downs.
- Talk to your Doctor or Physio if you have concerns (and take this sheet with you!)

## WRITE IT ON YOUR ACTIVITY TICK LIST

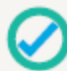

### PLAN TIME TO EXERCISE THIS WEEK

MAKE A **T**IME

IT'S **I**MPORTANT

BE **C**ONSISTENT

**K**NOW YOUR BACK IS UP TO IT

WHAT

WHEN

TICK

| WHAT | WHEN | TICK |
|------|------|------|
|      |      |      |
|      |      |      |
|      |      |      |

Cite this as: Karran et al. 2017
