# Supplementary material for: A quasi-randomised, controlled, feasibility trial of GLITtER (Green Light Imaging Interpretation to Enhance Recovery)—a psychoeducational intervention for adults with low back pain attending secondary care
Source: PubMed Central journal article supplement (PMC5797685; doi:10.7717/peerj.4301), 2018-02-01
Supplement: peerj-06-4301-s010.pdf [file peerj-06-4301-s010.pdf]

## Supplement 10 – Final patient eligibility checklist

---

(Completed by clinician. Clinician must circle all “No” responses for patient to meet final eligibility criteria.)

Does this patient.....

|                                                                        |     |    |
|------------------------------------------------------------------------|-----|----|
| 1. Require further imaging, investigations or intervention?            | Yes | No |
| 2. Require further surgical opinion?                                   | Yes | No |
| 3. Have lumbar pathology warranting significant caution with activity? | Yes | No |
| 4. Engage in their usual activity, unrestricted due to pain?           | Yes | No |
| 5. Engage in regular exercise, unrestricted due to pain?               | Yes | No |

Clinician: \_\_\_\_\_
