# Supplementary material for: A quasi-randomised, controlled, feasibility trial of GLITtER (Green Light Imaging Interpretation to Enhance Recovery)—a psychoeducational intervention for adults with low back pain attending secondary care
Source: PeerJ journal article supplement (doi:10.7717/peerj.4301), 2018-02-01

## Supplement 7 – Visual aid A

### Percentage of 'abnormal' findings on lumbar CT and MRI images in pain-free subjects

Brinjikji et al. (2014) Am J Neuroradiology

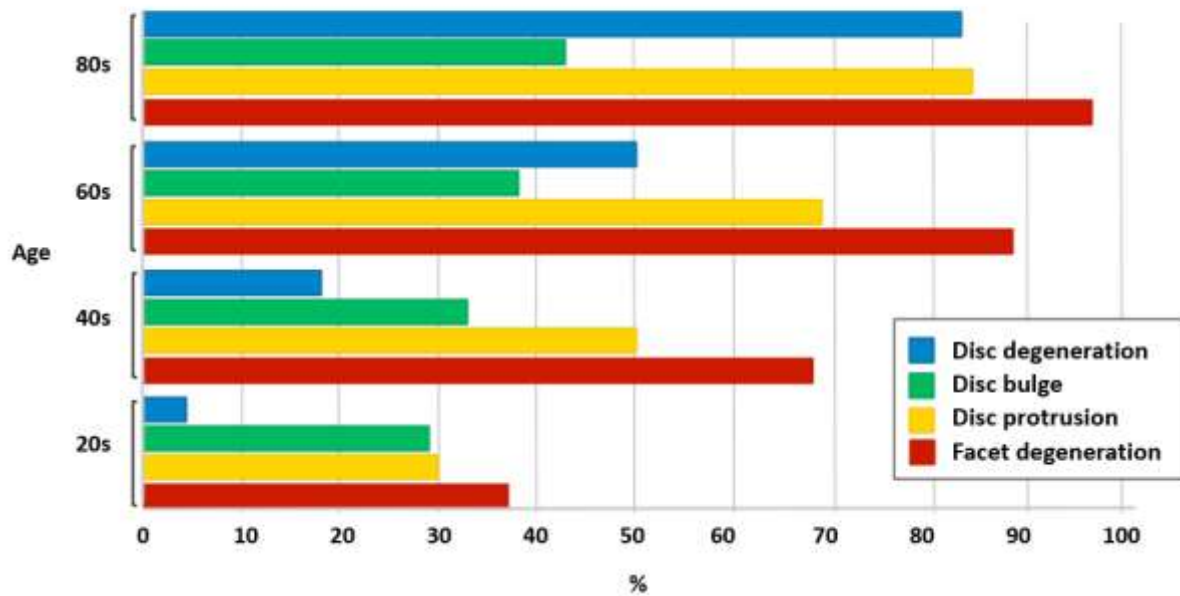

Supplement: Supplement_7-Visual_Aid_A.pdf [file Supplement_7-Visual_Aid_A.pdf]
