# Supplementary material for: A quasi-randomised, controlled, feasibility trial of GLITtER (Green Light Imaging Interpretation to Enhance Recovery)—a psychoeducational intervention for adults with low back pain attending secondary care
Source: PeerJ. 2018 Feb 1;6:e4301. doi: 10.7717/peerj.4301 (PMC5797685; doi:10.7717/peerj.4301)
Supplement: Supplemental Information 4 [file peerj-06-4301-s004.pdf]

#### Supplement 4 – Outcome measures (1): Pain and Disability NRS & Reassurance Questions

---

1. In the past 7 days, how would you rate the intensity of your pain on average?  
(Circle a number)

|      |   |   |   |   |   |   |   |   |   |            |
|------|---|---|---|---|---|---|---|---|---|------------|
| 0    | 1 | 2 | 3 | 4 | 5 | 6 | 7 | 8 | 9 | 10         |
| No   |   |   |   |   |   |   |   |   |   | Worst pain |
| pain |   |   |   |   |   |   |   |   |   | imaginable |

2. In the past 7 days, how much has your pain interfered with your daily activities on average? (Circle a number)

|              |   |   |   |   |   |   |   |   |   |            |
|--------------|---|---|---|---|---|---|---|---|---|------------|
| 0            | 1 | 2 | 3 | 4 | 5 | 6 | 7 | 8 | 9 | 10         |
| No           |   |   |   |   |   |   |   |   |   | Unable to  |
| interference |   |   |   |   |   |   |   |   |   | carry on   |
|              |   |   |   |   |   |   |   |   |   | activities |

3. Rate your belief in how likely it is that you will require an operation on your back?  
(circle a number)

|            |   |   |   |   |   |   |   |   |   |           |
|------------|---|---|---|---|---|---|---|---|---|-----------|
| 0          | 1 | 2 | 3 | 4 | 5 | 6 | 7 | 8 | 9 | 10        |
| Not at     |   |   |   |   |   |   |   |   |   | Extremely |
| all likely |   |   |   |   |   |   |   |   |   | likely    |

4. How reassured are you that there is nothing seriously wrong with your back? (circle a number)

|           |   |   |   |   |   |   |   |   |   |            |
|-----------|---|---|---|---|---|---|---|---|---|------------|
| 0         | 1 | 2 | 3 | 4 | 5 | 6 | 7 | 8 | 9 | 10         |
| Extremely |   |   |   |   |   |   |   |   |   | Not at all |
| reassured |   |   |   |   |   |   |   |   |   | reassured  |

5. Do you think more tests or scans are needed at this stage? (circle)      **Y / N**
